# Supplementary material for: A 6-week supplementation with grape pomace to subjects at cardiometabolic risk ameliorates insulin sensitivity, without affecting other metabolic syndrome markers
Source: Royal Society of Chemistry journal article supplement (doi:10.1039/c8fo01323c), 2018-01-01

## ELECTRONIC SUPPLEMENTARY INFORMATION

**Table S1.** Composition of dried grape pomace used in the clinical trial with subjects at high cardiometabolic risk

| Component                                | Content (%)  |
|------------------------------------------|--------------|
| <b>Proximal composition</b>              |              |
| Carbohydrates                            |              |
| Simple sugars                            | 2.49 ± 0.12  |
| Soluble dietary fiber                    | 2.58 ± 0.02  |
| Insoluble dietary fiber                  | 65.65 ± 2.08 |
| Protein                                  | 11.57 ± 0.34 |
| Fat                                      | 10.35 ± 0.21 |
| Ash                                      | 5.75 ± 0.21  |
| Humidity                                 | 1.71 ± 0.08  |
| <b>Caloric value (kcal/g)</b>            | 2.85         |
| <b>Polyphenol composition</b>            |              |
| Extractable polyphenols                  | 6.22 ± 0.17  |
| Non-extractable polyphenols <sup>1</sup> | 23.44 ± 1.16 |
| Total polyphenols                        | 29.63 ± 1.18 |

<sup>1</sup> A fraction is included in dietary fiber.

Data are presented as mean ± standard deviation. The dose used in the study was 8 g. The composition of the dietary supplement was determined by standard methodologies: dietary fiber, by the indigestible fraction method<sup>1</sup>; soluble sugars, by the dinitrosalicylic method<sup>2</sup> after extraction with ethanol/water (80:20, v/v); fat, using a Soxhlet System HT extractor with petroleum ether; and protein, using an FP-2000® (Dumas Leco Corp., St. Joseph, MI, USA) automated nitrogen analyzer. The polyphenol composition was determined as extractable polyphenols (EEP) and non-extractable polyphenols, divided into hydrolyzable polyphenols (HPP) and non-extractable proanthocyanidins (NEPA)<sup>3-5</sup>.

1. I. Goñi, M. E. Díaz-Rubio, J. Pérez-Jiménez and F. Saura-Calixto. Towards an updated methodology for measurement of dietary fiber, including associated polyphenols, in food and beverages. *Food Res Intl*, **2009**, 42, 840-846.
2. H. N. Englyst and J. H. Cummings. Improved method for measurement of dietary fiber as non-starch polysaccharides in plant foods. *J. AOAC*, **1988**, 71, 808-814.
3. P. W. Hartzfeld, R. Forkner, M. D. Hunter and A. E. Hagerman. Determination of hydrolyzable tannins (gallotannins and ellagitannins) after reaction with potassium iodate. *J. Agric. Food Chem.*, **2002**, 50, 1785-1790.
4. J. Pérez-Jiménez, S. Arranz, M. Tabernero, M. E. Díaz-Rubio, J. Serrano, I. Goñi and F. Saura-Calixto. Updated methodology to determine antioxidant capacity in plant foods, oils and beverages: Extraction, measurement and expression of results. *Food Res. Int.*, **2008**, 41, 274-285.
5. J. Zurita, M. E. Díaz-Rubio and F. Saura-Calixto. Improved procedure to determine non-extractable polymeric proanthocyanidins in plant foods. *Int. J. Food Sci. Nutr.*, **2012**, 63, 936-39.

**Table S2.** Characteristics of the diet followed by subjects at high cardiometabolic risk participating in a clinical trial with grape pomace. Data are represented as mean with their standard errors.

| Parameter                       | Pre-study |     | Control period |     | Supplementation period* |     |
|---------------------------------|-----------|-----|----------------|-----|-------------------------|-----|
|                                 | Mean      | SEM | Mean           | SEM | Mean                    | SEM |
| Energy (kcal)                   | 1,877     | 92  | 1,870          | 87  | 1,862                   | 71  |
| Protein (g)                     | 80        | 4   | 86             | 4   | 79                      | 3   |
| Carbohydrates (g)               | 188       | 10  | 188            | 9   | 185                     | 8   |
| Dietary fibre (g)               | 24        | 2   | 24             | 2   | 21                      | 1   |
| Lipids (g)                      | 81        | 5   | 89             | 5   | 78                      | 4   |
| Cholesterol (mg)                | 289       | 17  | 313            | 17  | 274                     | 15  |
| Saturated fatty acids (g)       | 27        | 2   | 31             | 2   | 25                      | 1   |
| Monounsaturated fatty acids (g) | 34        | 2   | 36             | 2   | 33                      | 2   |
| Polyunsaturated fatty acids (g) | 12        | 1   | 12             | 1   | 11                      | 1   |
| Minerals (mg)                   |           |     |                |     |                         |     |
| Calcium                         | 775       | 50  | 824            | 47  | 768                     | 49  |
| Iron                            | 14        | 1   | 14             | 1   | 13                      | 1   |
| Sodium                          | 2,043     | 151 | 2,060          | 136 | 2,278                   | 131 |
| Vitamins                        |           |     |                |     |                         |     |
| Vitamin A (µg)                  | 800       | 7   | 908            | 66  | 838                     | 56  |
| Vitamin B1 (mg)                 | 1.5       | 0.1 | 1.6            | 0.1 | 1.4                     | 0.1 |
| Vitamin B2 (mg)                 | 1.7       | 0.1 | 1.7            | 0.1 | 1.6                     | 0.1 |
| Vitamin B9 (µg)                 | 268       | 18  | 270            | 16  | 240                     | 14  |
| Vitamin C (mg)                  | 135       | 14  | 134            | 12  | 116                     | 9   |

\* Excluding the specific contribution of grape pomace to the intake of macro and micronutrients (see Table S1).

Data from three telephone 24 h dietary recalls for each period. The number of subjects is different for each period ( $n= 45$  for the pre-study period,  $n=48$  for the control period and the supplementation period), due to problems to contact some of them.

No significant differences ( $p < 0.05$ ) were found between treatments (one-way ANOVA).

**Table S3.** Modification in physical activity of subjects at high cardiometabolic risk during clinical trial with grape pomace supplementation.

Data are referred to the previous visit. Light grey, no modification; dark grey, increase; black, decrease.

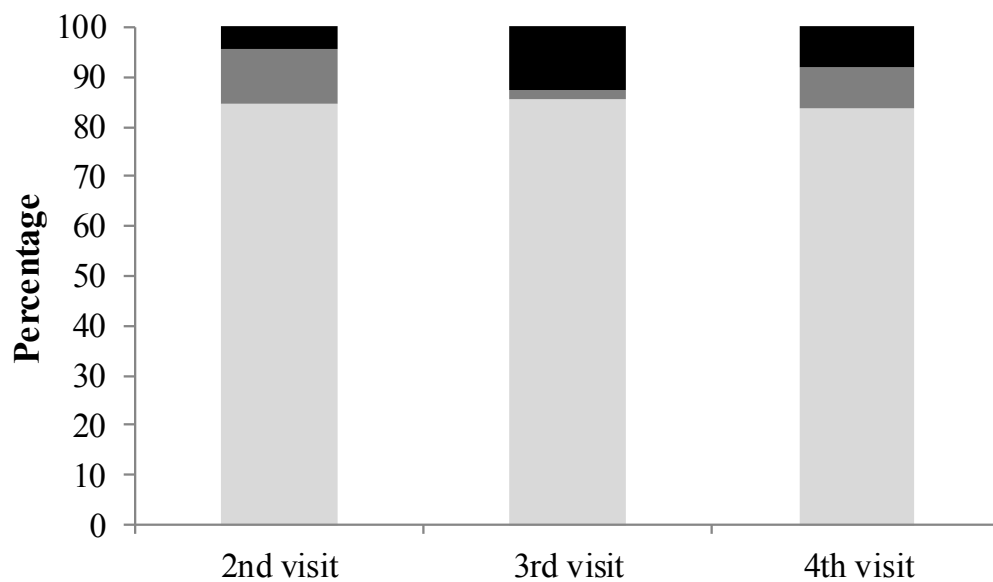

Supplement: c8fo01323c1.pdf [file c8fo01323c1.pdf]
